# Supplementary material for: Role of Preoperative Assessment in Predicting Tumor-Induced Plasticity in Patients with Diffuse Gliomas
Source: PubMed Central journal article supplement (PMC7961995; doi:10.3390/jcm10051108), 2021-03-07
Supplement: jcm-10-01108-s001.pdf [file jcm-10-01108-s001.pdf]

## Electronic Supplementary material 1

| Neuropsychological tests Speech/Language tests                         |                                                           |
|------------------------------------------------------------------------|-----------------------------------------------------------|
| Digit Span <sup>1</sup>                                                | BeSS <sup>9</sup>                                         |
| Coding <sup>2</sup>                                                    | Boston Naming Test (BNT) <sup>10</sup>                    |
| Trail Making Test (TMT) trials 1-5 <sup>3</sup>                        | Token test (version C) <sup>11</sup>                      |
| Rey Auditory Verbal Learning Test (RAVLT) Swedish version <sup>4</sup> | Neurolingvistisk afasiundersökning (A-ning) <sup>12</sup> |
| Brief Visuospatial Memory Test-Revised (BVMT-R) <sup>5</sup>           | Word fluency (FAS, Animals and Verbs) <sup>13</sup> LS    |
| Rey Complex Figure Test (RCFT) <sup>6</sup>                            | Reading Words and Nonwords <sup>14</sup>                  |
| Zoo Map Test <sup>7</sup>                                              | Oralmotorisk diadochokinesi <sup>15</sup>                 |
| Color-Word Interference Test trials 1-4 <sup>3</sup>                   | STAVUX <sup>16</sup>                                      |
| Hospital Anxiety and Depression Scale (HADS) <sup>8</sup>              |                                                           |

Summary of the neuropsychological and language tests administered pre- and postoperatively in patients with low-grade gliomas.

## References

- 1) Wechsler, D. (2008). Wechsler Adult Intelligence Scale—Fourth Edition. San Antonio, TX: Pearson
- 2) Randolph, C. (1998). RBANS Manual: Repeatable battery for the assessment of neuropsychological status. San Antonio, TX: The Psychological Corporation.
- 3) Delis, D.C., Kaplan, F. & Kramer, J.H. (2001). Delis-Kaplan executive function system. San Antonio, TX: The Psychological Corporation.
- 4) Schmidt, M. (1996) *Rey Auditory and Verbal Learning Test. A Handbook*. Los Angeles: Western Psychological Services.
- 5) Benedict, R.H.B. (1997). *The Brief Visual Memory Test-Revised*. Lutz, FL: Psychological Assessment Resources
- 6) Meyers, J.E. & Meyers, K.R. (1995) *Rey Complex Figure Test and Recognition Trial*. Lutz, FL: Psychological Assessment Resources.
- 7) Wilson, B.A., Alderman, N., Burgess, P.W., et al. (1996). *Behavioural assessment of the dysexecutive syndrome*. Bury St. Edmunds, UK: Thames Valley Test.
- 8) Zigmond, A.S., & Snaith, R.P. (1983). The Hospital Anxiety and Depression Scale. *Acta Psychiatrica Scandinavica*, 67, 361-370.
- 9) Laakso, K., Brunnegård, K., Hartelius, L., & Ahlsén, E. (2000). Assessing high-level language in individuals with multiple sclerosis: A pilot study. *Clinical Linguistics & Phonetics*, 14(5), 329–349.
- 10) Kaplan, E., Goodglass, H., & Weintraub, S. (1983). Boston Naming Test.
- 11) De Renzi, E., & Vignolo, L. A. (1962). The Token test: A sensitive test to detect receptive disturbances in aphasia. *Brain*, 85, 665-678.
- Svensk normering av: Apt, P. (2008). Token test. Malmö: MAS.
- 12) Werner, C. & Lindström, E. (1995). A-ning. Neurolingvistisk afasiundersökning. Stockholm: Ersta diakonisällskap.
- 13) Spreen, O. & Benton, A. L. (1969). Neurosensory Center Comprehensive Examination for Aphasia. Victoria, Canada: University of Victoria.
- 14) Johansson, M-G. (2004). LS. Stockholm: Psykologiförlaget AB.
- 15) Hartelius, L. (2015). Dysartri - bedömning och intervention. Lund: Studentlitteratur AB.

- 16) Nilsson, E. & Pettersson, K. (2009). Utveckling och normering av ett stavningstest för vuxna (STAVUX). Magisteruppsats i logopedi. Institutionen för neurovetenskap. Uppsala Universitet.
